# Supplementary material
Source: publisher site journal article supplement (https://www.kjim.org/upload/media/kjim-2021-186-suppl3.pdf)
Supplement: Supplementary file 1 [file kjim-2021-186-suppl3.pdf]

Number of newly reported confirmed case in Seoul during the study period

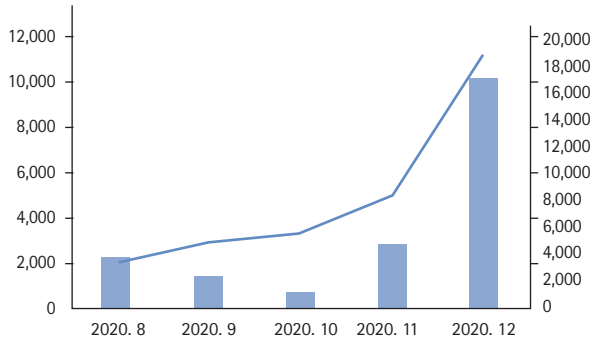

Confirmed cases (newly reported) Confirmed cases (cumulated total)

Number of deaths from COVID-19 in Seoul during the study period

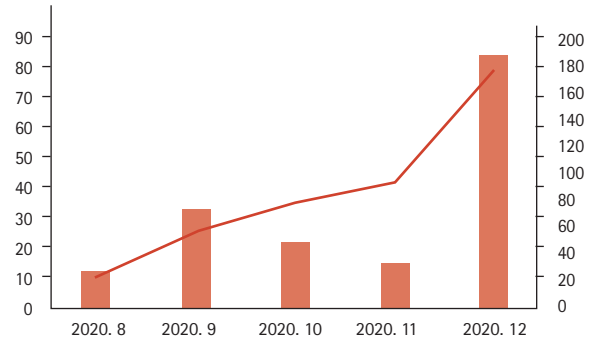

Deaths (newly reported) Deaths (cumulated total)

**Supplementary Figure 3.** The number of newly reported coronavirus disease 2019 (COVID-19) cases and number of deaths from COVID-19 during the study period in Seoul [26,27].
